# Supplementary material for: Hepatitis C Virus Network Based Classification of Hepatocellular Cirrhosis and Carcinoma
Source: PLoS One. 2012 Apr 6;7(4):e34460. doi: 10.1371/journal.pone.0034460 (PMC3321022; doi:10.1371/journal.pone.0034460)
Supplement: Table S1 — The IFS table of the target genes. (XLSX) [file pone.0034460.s002.xlsx]

## Sheet: TableS1
Table S1 - The IFS table of the target genes
Numbers of genes	Accuracy
1	0.475806
2	0.75
3	0.774194
4	0.83871
5	0.782258
6	0.822581
7	0.830645
8	0.83871
9	0.83871
10	0.862903
11	0.895161
12	0.903226
13	0.870968
14	0.870968
15	0.862903
16	0.895161
17	0.903226
18	0.879032
19	0.870968
20	0.870968
21	0.870968
22	0.879032
23	0.862903
24	0.887097
25	0.887097
26	0.887097
27	0.887097
28	0.887097
29	0.887097
30	0.895161
31	0.91129
32	0.903226
33	0.919355
34	0.919355
35	0.91129
36	0.895161
37	0.903226
38	0.887097
39	0.895161
40	0.903226
41	0.91129
42	0.887097
43	0.887097
44	0.879032
45	0.879032
46	0.870968
47	0.870968
48	0.879032
49	0.870968
50	0.870968
51	0.870968
52	0.862903
53	0.870968
54	0.879032
55	0.887097
56	0.879032
57	0.887097
58	0.895161
59	0.879032
60	0.879032
61	0.895161
62	0.895161
63	0.895161
64	0.91129
65	0.91129
66	0.903226
67	0.903226
68	0.895161
69	0.895161
70	0.91129
71	0.91129
72	0.91129
73	0.919355
74	0.919355
75	0.919355
76	0.919355
77	0.919355
78	0.919355
79	0.919355
80	0.919355
81	0.919355
82	0.91129
83	0.91129
84	0.91129
85	0.91129
86	0.903226
87	0.91129
88	0.91129
89	0.91129
90	0.91129
91	0.91129
92	0.903226
93	0.895161
94	0.895161
95	0.903226
96	0.903226
97	0.91129
98	0.927419
99	0.919355
100	0.919355
101	0.91129
102	0.91129
103	0.903226
104	0.903226
105	0.927419
106	0.927419
107	0.927419
108	0.927419
109	0.927419
110	0.927419
111	0.927419
112	0.927419
113	0.927419
114	0.927419
115	0.927419
116	0.927419
117	0.919355
118	0.919355
119	0.919355
120	0.919355
121	0.919355
122	0.927419
123	0.927419
124	0.927419
125	0.927419
126	0.919355
127	0.919355
128	0.927419
129	0.927419
130	0.919355
131	0.919355
132	0.919355
133	0.919355
134	0.919355
135	0.927419
136	0.919355
137	0.935484
138	0.927419
139	0.935484
140	0.935484
141	0.935484
142	0.935484
143	0.935484
144	0.927419
145	0.927419
146	0.927419
147	0.927419
148	0.919355
149	0.927419
150	0.927419
151	0.935484
152	0.927419
153	0.935484
154	0.935484
155	0.943548
156	0.943548
157	0.943548
158	0.943548
159	0.943548
160	0.943548
161	0.935484
162	0.935484
163	0.935484
164	0.927419
165	0.919355
166	0.919355
167	0.919355
168	0.919355
169	0.919355
170	0.919355
171	0.919355
172	0.919355
173	0.919355
174	0.919355
175	0.919355
176	0.927419
177	0.935484
178	0.927419
179	0.935484
180	0.927419
181	0.927419
182	0.927419
183	0.927419
184	0.927419
185	0.927419
186	0.927419
187	0.927419
188	0.927419
189	0.927419
190	0.927419
191	0.927419
192	0.919355
193	0.91129
194	0.91129
195	0.91129
196	0.903226
197	0.903226
198	0.903226
199	0.903226
200	0.91129
201	0.91129
202	0.91129
203	0.91129
204	0.91129
205	0.91129
206	0.91129
207	0.91129
208	0.91129
209	0.91129
210	0.919355
211	0.91129
212	0.91129
213	0.91129
214	0.91129
215	0.91129
216	0.919355
217	0.91129
218	0.91129
219	0.91129
220	0.91129
221	0.91129
222	0.91129
223	0.91129
224	0.91129
225	0.919355
226	0.919355
227	0.919355
228	0.91129
229	0.919355
230	0.919355
231	0.919355
232	0.919355
233	0.919355
234	0.91129
235	0.91129
236	0.919355
237	0.919355
238	0.919355
239	0.919355
240	0.927419
241	0.927419
242	0.927419
243	0.927419
244	0.927419
245	0.919355
246	0.919355
247	0.919355
248	0.919355
249	0.919355
250	0.927419
251	0.927419
252	0.919355
253	0.919355
254	0.927419
255	0.927419
256	0.927419
257	0.927419
258	0.927419
259	0.927419
260	0.927419
261	0.927419
262	0.927419
263	0.927419
264	0.935484
265	0.927419
266	0.927419
267	0.927419
268	0.935484
269	0.935484
270	0.935484
271	0.935484
272	0.935484
273	0.935484
274	0.935484
275	0.935484
276	0.935484
277	0.927419
278	0.927419
279	0.927419
280	0.927419
281	0.927419
282	0.927419
283	0.927419
284	0.927419
285	0.927419
286	0.927419
287	0.927419
288	0.927419
289	0.927419
290	0.927419
