# Supplementary material for: Hepatitis C Virus Network Based Classification of Hepatocellular Cirrhosis and Carcinoma
Source: PLoS One. 2012 Apr 6;7(4):e34460. doi: 10.1371/journal.pone.0034460 (PMC3321022; doi:10.1371/journal.pone.0034460)
Supplement: Table S5 — The KEGG enrichment result of the 155 selected target genes. (XLSX) [file pone.0034460.s006.xlsx]

## Sheet: TableS5
Table S5 - The KEGG enrichment result of the 155 selected target genes
Annotations	NGR	NG	Hyp	Hyp*		NGR = Number of annotated genes in the reference list (Total number of genes in the reference list);
(KEGG) 05212 :Pancreatic cancer	72(19196)	10(155)	3.07078e-10	3.1322e-08		NG = Number of annotated genes in the input list (Total number of genes in the input list);
(KEGG) 05200 :Pathways in cancer	325(19196)	16(155)	8.98225e-09	4.58095e-07		Hyp = Hypergeometric pValue; Hyp* = Corrected hypergeometric pValue
(KEGG) 04722 :Neurotrophin signaling pathway	124(19196)	10(155)	6.53214e-08	2.22093e-06
(KEGG) 05220 :Chronic myeloid leukemia	75(19196)	8(155)	1.60856e-07	4.10183e-06
(KEGG) 04660 :T cell receptor signaling pathway	108(19196)	9(155)	2.28758e-07	4.66666e-06
(KEGG) 05210 :Colorectal cancer	84(19196)	8(155)	3.90937e-07	6.64593e-06
(KEGG) 04210 :Apoptosis	87(19196)	8(155)	5.13403e-07	7.48101e-06
(KEGG) 04520 :Adherens junction	74(19196)	7(155)	2.2346e-06	2.84911e-05
(KEGG) 04662 :B cell receptor signaling pathway	75(19196)	7(155)	2.44807e-06	2.77448e-05
(KEGG) 04062 :Chemokine signaling pathway	188(19196)	10(155)	3.07084e-06	3.13226e-05
(KEGG) 04510 :Focal adhesion	198(19196)	10(155)	4.87427e-06	4.51977e-05
(KEGG) 05221 :Acute myeloid leukemia	56(19196)	6(155)	5.85247e-06	4.9746e-05
(KEGG) 05020 :Prion diseases	34(19196)	5(155)	7.41049e-06	5.81438e-05
(KEGG) 05215 :Prostate cancer	89(19196)	7(155)	7.73343e-06	5.63436e-05
(KEGG) 04664 :Fc epsilon RI signaling pathway	78(19196)	6(155)	4.00081e-05	0.000272055
(KEGG) 04010 :MAPK signaling pathway	265(19196)	10(155)	6.01987e-05	0.000383767
(KEGG) 05222 :Small cell lung cancer	84(19196)	6(155)	6.0847e-05	0.000365082
(KEGG) 05213 :Endometrial cancer	52(19196)	5(155)	6.15747e-05	0.000348923
(KEGG) 05223 :Non-small cell lung cancer	54(19196)	5(155)	7.39604e-05	0.00039705
(KEGG) 04012 :ErbB signaling pathway	87(19196)	6(155)	7.41044e-05	0.000377933
(KEGG) 05214 :Glioma	63(19196)	5(155)	0.000155065	0.000753172
(KEGG) 04620 :Toll-like receptor signaling pathway	101(19196)	6(155)	0.000169523	0.000785972
(KEGG) 04920 :Adipocytokine signaling pathway	67(19196)	5(155)	0.000207611	0.000920711
(KEGG) 05211 :Renal cell carcinoma	70(19196)	5(155)	0.000255177	0.0010845
(KEGG) 04370 :VEGF signaling pathway	75(19196)	5(155)	0.000352312	0.00143743
(KEGG) 04110 :Cell cycle	123(19196)	6(155)	0.000491558	0.00192842
(KEGG) 04512 :ECM-receptor interaction	84(19196)	5(155)	0.000594588	0.00224622
(KEGG) 04914 :Progesterone-mediated oocyte maturation	85(19196)	5(155)	0.000627685	0.00228657
(KEGG) 04350 :TGF-beta signaling pathway	86(19196)	5(155)	0.000662144	0.00232892
(KEGG) 04650 :Natural killer cell mediated cytotoxicity	131(19196)	6(155)	0.000685809	0.00233175
(KEGG) 04910 :Insulin signaling pathway	135(19196)	6(155)	0.000802881	0.00264174
(KEGG) 04912 :GnRH signaling pathway	98(19196)	5(155)	0.00119505	0.00380923
(KEGG) 04630 :Jak-STAT signaling pathway	155(19196)	6(155)	0.00163646	0.00505816
(KEGG) 05120 :Epithelial cell signaling in Helicobacter pylori infection	68(19196)	4(155)	0.00222987	0.00649848
(KEGG) 04115 :p53 signaling pathway	68(19196)	4(155)	0.00222987	0.00649848
(KEGG) 04610 :Complement and coagulation cascades	69(19196)	4(155)	0.00235242	0.00666518
(KEGG) 05218 :Melanoma	70(19196)	4(155)	0.00247952	0.00683544
(KEGG) 04622 :RIG-I-like receptor signaling pathway	71(19196)	4(155)	0.00261127	0.0070092
(KEGG) 04612 :Antigen processing and presentation	81(19196)	4(155)	0.00420218	0.0109903
(KEGG) 04540 :Gap junction	88(19196)	4(155)	0.00563985	0.0143816
(KEGG) 00740 :Riboflavin metabolism	16(19196)	2(155)	0.00721724	0.0179551
(KEGG) 04310 :Wnt signaling pathway	150(19196)	5(155)	0.00745964	0.0181163
(KEGG) 04916 :Melanogenesis	99(19196)	4(155)	0.00850615	0.0201774
(KEGG) 05014 :Amyotrophic lateral sclerosis (ALS)	52(19196)	3(155)	0.00854504	0.019809
(KEGG) 05130 :Pathogenic Escherichia coli infection	54(19196)	3(155)	0.00947904	0.0214858
(KEGG) 04114 :Oocyte meiosis	109(19196)	4(155)	0.0118197	0.026209
(KEGG) 04720 :Long-term potentiation	68(19196)	3(155)	0.0176514	0.0383073
