# Supplementary material for: Hepatitis C Virus Network Based Classification of Hepatocellular Cirrhosis and Carcinoma
Source: PLoS One. 2012 Apr 6;7(4):e34460. doi: 10.1371/journal.pone.0034460 (PMC3321022; doi:10.1371/journal.pone.0034460)
Supplement: Table S6 — The KEGG enrichment result of the 162 selected between genes. (XLSX) [file pone.0034460.s007.xlsx]

## Sheet: TableS6
Table S6 - The KEGG enrichment result of the 162 selected between genes
Annotations	NGR	NG	Hyp	Hyp*		NGR = Number of annotated genes in the reference list (Total number of genes in the reference list);
(KEGG) 05200 :Pathways in cancer	325(19196)	21(163)	5.51724e-13	6.1793e-11		NG = Number of annotated genes in the input list (Total number of genes in the input list);
(KEGG) 04062 :Chemokine signaling pathway	188(19196)	15(163)	7.06393e-11	3.9558e-09		Hyp = Hypergeometric pValue; Hyp* = Corrected hypergeometric pValue
(KEGG) 04360 :Axon guidance	129(19196)	12(163)	1.03779e-09	3.87442e-08
(KEGG) 05212 :Pancreatic cancer	72(19196)	9(163)	9.90343e-09	2.77296e-07
(KEGG) 04510 :Focal adhesion	198(19196)	13(163)	1.46794e-08	3.28819e-07
(KEGG) 04660 :T cell receptor signaling pathway	108(19196)	10(163)	2.7991e-08	5.22498e-07
(KEGG) 05222 :Small cell lung cancer	84(19196)	9(163)	3.92729e-08	6.28366e-07
(KEGG) 04670 :Leukocyte transendothelial migration	113(19196)	10(163)	4.32803e-08	6.05924e-07
(KEGG) 05215 :Prostate cancer	89(19196)	9(163)	6.54003e-08	8.1387e-07
(KEGG) 04666 :Fc gamma R-mediated phagocytosis	94(19196)	9(163)	1.05556e-07	1.18223e-06
(KEGG) 04810 :Regulation of actin cytoskeleton	210(19196)	12(163)	2.44998e-07	2.49453e-06
(KEGG) 05213 :Endometrial cancer	52(19196)	7(163)	2.7146e-07	2.53363e-06
(KEGG) 04722 :Neurotrophin signaling pathway	124(19196)	9(163)	1.13363e-06	9.76667e-06
(KEGG) 05219 :Bladder cancer	42(19196)	6(163)	1.3924e-06	1.11392e-05
(KEGG) 04664 :Fc epsilon RI signaling pathway	78(19196)	7(163)	4.45599e-06	3.32714e-05
(KEGG) 05223 :Non-small cell lung cancer	54(19196)	6(163)	6.30257e-06	4.4118e-05
(KEGG) 05210 :Colorectal cancer	84(19196)	7(163)	7.32088e-06	4.82317e-05
(KEGG) 04012 :ErbB signaling pathway	87(19196)	7(163)	9.24573e-06	5.7529e-05
(KEGG) 04650 :Natural killer cell mediated cytotoxicity	131(19196)	8(163)	1.62508e-05	9.5794e-05
(KEGG) 04912 :GnRH signaling pathway	98(19196)	7(163)	2.02466e-05	0.000113381
(KEGG) 04520 :Adherens junction	74(19196)	6(163)	3.93059e-05	0.000209631
(KEGG) 05220 :Chronic myeloid leukemia	75(19196)	6(163)	4.24264e-05	0.000215989
(KEGG) 04672 :Intestinal immune network for IgA production	48(19196)	5(163)	5.29248e-05	0.000257721
(KEGG) 04612 :Antigen processing and presentation	81(19196)	6(163)	6.55751e-05	0.000306017
(KEGG) 04512 :ECM-receptor interaction	84(19196)	6(163)	8.04303e-05	0.000360328
(KEGG) 05130 :Pathogenic Escherichia coli infection	54(19196)	5(163)	9.38213e-05	0.000404153
(KEGG) 04210 :Apoptosis	87(19196)	6(163)	9.78512e-05	0.000405901
(KEGG) 05221 :Acute myeloid leukemia	56(19196)	5(163)	0.000111784	0.000447136
(KEGG) 04514 :Cell adhesion molecules (CAMs)	131(19196)	7(163)	0.000129297	0.000499356
(KEGG) 04910 :Insulin signaling pathway	135(19196)	7(163)	0.000155912	0.000582073
(KEGG) 05020 :Prion diseases	34(19196)	4(163)	0.000190501	0.00068826
(KEGG) 05214 :Glioma	63(19196)	5(163)	0.000196099	0.000686347
(KEGG) 04916 :Melanogenesis	99(19196)	6(163)	0.000199707	0.000677795
(KEGG) 04630 :Jak-STAT signaling pathway	155(19196)	7(163)	0.000363518	0.00119747
(KEGG) 04270 :Vascular smooth muscle contraction	112(19196)	6(163)	0.000389512	0.00124644
(KEGG) 04370 :VEGF signaling pathway	75(19196)	5(163)	0.000443721	0.00134316
(KEGG) 04662 :B cell receptor signaling pathway	75(19196)	5(163)	0.000443721	0.00134316
(KEGG) 04010 :MAPK signaling pathway	265(19196)	9(163)	0.000448078	0.00132065
(KEGG) 03050 :Proteasome	44(19196)	4(163)	0.000522046	0.00149921
(KEGG) 04110 :Cell cycle	123(19196)	6(163)	0.00064095	0.00179466
(KEGG) 04540 :Gap junction	88(19196)	5(163)	0.000921983	0.00251859
(KEGG) 05014 :Amyotrophic lateral sclerosis (ALS)	52(19196)	4(163)	0.000987726	0.00263394
(KEGG) 04950 :Maturity onset diabetes of the young	25(19196)	3(163)	0.00120506	0.00313876
(KEGG) 04620 :Toll-like receptor signaling pathway	101(19196)	5(163)	0.00170683	0.00434466
(KEGG) 04114 :Oocyte meiosis	109(19196)	5(163)	0.00238479	0.00593547
(KEGG) 05010 :Alzheimer's disease	160(19196)	6(163)	0.00247409	0.00602388
(KEGG) 04720 :Long-term potentiation	68(19196)	4(163)	0.00267526	0.0063751
(KEGG) 04610 :Complement and coagulation cascades	69(19196)	4(163)	0.00282137	0.00658321
(KEGG) 05218 :Melanoma	70(19196)	4(163)	0.00297286	0.0066592
(KEGG) 05416 :Viral myocarditis	70(19196)	4(163)	0.00297286	0.0066592
(KEGG) 05340 :Primary immunodeficiency	35(19196)	3(163)	0.00322279	0.00707749
(KEGG) 04144 :Endocytosis	183(19196)	6(163)	0.00478358	0.0103031
(KEGG) 04742 :Taste transduction	49(19196)	3(163)	0.00832046	0.0175829
(KEGG) 04310 :Wnt signaling pathway	150(19196)	5(163)	0.00916197	0.0190026
(KEGG) 05110 :Vibrio cholerae infection	54(19196)	3(163)	0.0108623	0.0221197
(KEGG) 04020 :Calcium signaling pathway	175(19196)	5(163)	0.016916	0.0338321
(KEGG) 04320 :Dorso-ventral axis formation	24(19196)	2(163)	0.017499	0.0343839
(KEGG) 00563 :Glycosylphosphatidylinositol(GPI)-anchor biosynthesis	25(19196)	2(163)	0.0189158	0.0365271
(KEGG) 05120 :Epithelial cell signaling in Helicobacter pylori infection	68(19196)	3(163)	0.0201427	0.038237
(KEGG) 03320 :PPAR signaling pathway	69(19196)	3(163)	0.02093	0.0384289
(KEGG) 04730 :Long-term depression	69(19196)	3(163)	0.02093	0.0384289
(KEGG) 05211 :Renal cell carcinoma	70(19196)	3(163)	0.0217341	0.0392616
(KEGG) 05412 :Arrhythmogenic right ventricular cardiomyopathy (ARVC)	73(19196)	3(163)	0.0242466	0.043105
(KEGG) 05216 :Thyroid cancer	29(19196)	2(163)	0.0250409	0.0438215
(KEGG) 00020 :Citrate cycle (TCA cycle)	30(19196)	2(163)	0.0266822	0.0459755
(KEGG) 04120 :Ubiquitin mediated proteolysis	134(19196)	4(163)	0.0274968	0.0466612
