# Supplementary material for: Hepatitis C Virus Network Based Classification of Hepatocellular Cirrhosis and Carcinoma
Source: PLoS One. 2012 Apr 6;7(4):e34460. doi: 10.1371/journal.pone.0034460 (PMC3321022; doi:10.1371/journal.pone.0034460)
Supplement: Table S7 — The top 20 enriched KEGG pathways for the 155 selected target genes, the 162 selected between genes, the original 290 target genes, and the 684 original between genes. (XLSX) [file pone.0034460.s008.xlsx]

## Sheet: Sheet1
Table S7 - The top 20 enriched KEGG pathways for the 155 selected target genes, the 162 selected between genes, the original 290 target genes, and the 684 original between genes
Rank	The top 20 enriched KEGG pathways of the 155 selected target genes	The top 20 enriched KEGG pathways of the 162 selected between genes	The top 20 enriched KEGG pathways of the original 290 target genes	The top 20 enriched KEGG pathways of the original 684 between genes
1	(KEGG) 05212 :Pancreatic cancer	(KEGG) 05200 :Pathways in cancer	(KEGG) 05160 :Hepatitis C	(KEGG) 05200 :Pathways in cancer
2	(KEGG) 05200 :Pathways in cancer	(KEGG) 04062 :Chemokine signaling pathway	(KEGG) 05162 :Measles	(KEGG) 05215 :Prostate cancer
3	(KEGG) 04722 :Neurotrophin signaling pathway	(KEGG) 04360 :Axon guidance	(KEGG) 05200 :Pathways in cancer	(KEGG) 05220 :Chronic myeloid leukemia
4	(KEGG) 05220 :Chronic myeloid leukemia	(KEGG) 05212 :Pancreatic cancer	(KEGG) 04510 :Focal adhesion	(KEGG) 04660 :T cell receptor signaling pathway
5	(KEGG) 04660 :T cell receptor signaling pathway	(KEGG) 04510 :Focal adhesion	(KEGG) 04722 :Neurotrophin signaling pathway	(KEGG) 04510 :Focal adhesion
6	(KEGG) 05210 :Colorectal cancer	(KEGG) 04660 :T cell receptor signaling pathway	(KEGG) 04520 :Adherens junction	(KEGG) 04722 :Neurotrophin signaling pathway
7	(KEGG) 04210 :Apoptosis	(KEGG) 05222 :Small cell lung cancer	(KEGG) 05212 :Pancreatic cancer	(KEGG) 05212 :Pancreatic cancer
8	(KEGG) 04520 :Adherens junction	(KEGG) 04670 :Leukocyte transendothelial migration	(KEGG) 05152 :Tuberculosis	(KEGG) 04010 :MAPK signaling pathway
9	(KEGG) 04662 :B cell receptor signaling pathway	(KEGG) 05215 :Prostate cancer	(KEGG) 05222 :Small cell lung cancer	(KEGG) 05222 :Small cell lung cancer
10	(KEGG) 04062 :Chemokine signaling pathway	(KEGG) 04666 :Fc gamma R-mediated phagocytosis	(KEGG) 04062 :Chemokine signaling pathway	(KEGG) 05223 :Non-small cell lung cancer
11	(KEGG) 04510 :Focal adhesion	(KEGG) 04810 :Regulation of actin cytoskeleton	(KEGG) 05142 :Chagas disease (American trypanosomiasis)	(KEGG) 05145 :Toxoplasmosis
12	(KEGG) 05221 :Acute myeloid leukemia	(KEGG) 05213 :Endometrial cancer	(KEGG) 04512 :ECM-receptor interaction	(KEGG) 05214 :Glioma
13	(KEGG) 05020 :Prion diseases	(KEGG) 04722 :Neurotrophin signaling pathway	(KEGG) 04380 :Osteoclast differentiation	(KEGG) 05160 :Hepatitis C
14	(KEGG) 05215 :Prostate cancer	(KEGG) 05219 :Bladder cancer	(KEGG) 04210 :Apoptosis	(KEGG) 05213 :Endometrial cancer
15	(KEGG) 04664 :Fc epsilon RI signaling pathway	(KEGG) 04664 :Fc epsilon RI signaling pathway	(KEGG) 05215 :Prostate cancer	(KEGG) 04012 :ErbB signaling pathway
16	(KEGG) 04010 :MAPK signaling pathway	(KEGG) 05223 :Non-small cell lung cancer	(KEGG) 05145 :Toxoplasmosis	(KEGG) 04210 :Apoptosis
17	(KEGG) 05222 :Small cell lung cancer	(KEGG) 05210 :Colorectal cancer	(KEGG) 05220 :Chronic myeloid leukemia	(KEGG) 05152 :Tuberculosis
18	(KEGG) 05213 :Endometrial cancer	(KEGG) 04012 :ErbB signaling pathway	(KEGG) 05210 :Colorectal cancer	(KEGG) 04810 :Regulation of actin cytoskeleton
19	(KEGG) 05223 :Non-small cell lung cancer	(KEGG) 04650 :Natural killer cell mediated cytotoxicity	(KEGG) 04660 :T cell receptor signaling pathway	(KEGG) 04110 :Cell cycle
20	(KEGG) 04012 :ErbB signaling pathway	(KEGG) 04912 :GnRH signaling pathway	(KEGG) 04810 :Regulation of actin cytoskeleton	(KEGG) 05162 :Measles
Number of cancer pathways (in yellow)	7	8	5	6
Number of signaling pathways (in blue)	7	6	3	4
